# Supplementary material for: Grouped semantic-feature relation extraction from texts to represent medicinal-plant property knowledge on social media
Source: Frontiers journal article supplement (doi:10.3389/frai.2025.1579357), 2025-08-08
Supplement: Table_2.xlsx [file Table_2.xlsx]

## Sheet: Sheet1
Table A.1 Thai-herbal-plant corpus
Source	Plant Name as Document Name	Medicinal Benefits	EDU(Sentence) Segmentation where '|.. |' is a segmented EDU tag ; '/…../' is a segmented paragraph tag ; '<...>...<>' is a section tag; '<<…>>...<<>>' is a sub-section tag; [..]' is ellipsis.
https://pharmacy.su.ac.th/herbmed/text/	ข่า/Greater Galangal, Galangal.	ประโยชน์ทางยา เหง้าหรือลำต้นใต้ดิน รสเผ็ดร้อนขม แก้ฟกช้ำ แก้บวม แก้อาการท้องอืด ท้องเฟ้อ จุกเสียด แน่น แก้กลาก เกลื้อน ขับลมในลำไส้ แก้ปวดมวนในท้อง ขับลมในสตรีหลังคลอดบุตร ใช้ภายนอกรักษาอาการคันในโรคลมพิษ ช่วยย่อยอาหาร แก้บิด แก้ลมพิษ แก้โรคปวดบวมตามข้อ หลอดลมอักเสบ มีฤทธิ์กดหัวใจ กระตุ้นการหายใจ กดการหายใจ กระตุ้นการหายใจในเด็ก เป็นยาธาตุ ผล รสเผ็ดร้อนฉุน ช่วยย่อยอาหาร แก้ปวดท้อง แก้ท้องอืด ท้อง…	<[ประโยชน์ทางยา]><<|เหง้าหรือลำต้นใต้ดิน|>> /|[มี]รสเผ็ดร้อนขม| |แก้ฟกช้ำ| |แก้บวม| |แก้อาการท้องอืด ท้องเฟ้อ| |จุกเสียด| |แน่น| |แก้กลากเกลื้อน| |ขับลมในลำไส้| |แก้ปวดมวนในท้อง| |ขับลมในสตรี| |หลังคลอดบุตร| |ใช้ภายนอกรักษาอาการคันในโรคลมพิษ| |ช่วยย่อยอาหาร| |แก้บิด| |แก้ลมพิษ| |แก้โรคปวดบวมตามข้อ| |[แก้]หลอดลมอักเสบ| |มีฤทธิ์กดหัวใจ| |กระตุ้นการหายใจ| |กดการหายใจ| |กระตุ้นการหายใจในเด็ก| |เป็นยา…
	กระชาย/Fingerroot, Chinese ginger, Chinese key	ประโยชน์ทางยา เหง้า (ลำต้นใต้ดิน) มีรสเผ็ดร้นขม แก้โรคอันเกิดในปาก แก้มุตกิด แก้ลมอันบังเกิดแก่กองหทัยวาต แก้โรคในปากเปื่อย ปากแตกเป็นแผล ปากแห้ง ขับระดูขาว แก้ใจสั่นหวิว บำรุงหัวใจ แก้ไอ แก้ปวดมวลในท้อง ท้องร่วง รักษา อาการแน่น จุกเสียด ท้องอืด ท้องเฟ้อ ขับปัสสาวะรักษาโรคบิด แก้บิดมูกเลือด ปวดเบ่ง แก้ลำไส้ใหญ่อักเสบ บำรุงกำลัง ใช้ภายนอกรักษาโรคกลากเกลื้อน ราก (นมกระชาย) มีรสเผ็ดร้อนขม มีสรรพคุณค…	<|ประโยชน์ทางยา|><<|เหง้า (ลำต้นใต้ดิน)|>> /|มีรสเผ็ดร้อนขม| |แก้โรคอันเกิดในปาก| |แก้มุตกิด| |แก้ลมอันบังเกิดแก่กองหทัยวาต| |แก้โรคในปากเปื่อย ปากแตกเป็นแผล| |[แก้]ปากแห้ง| |ขับระดูขาว| |แก้ใจสั่นหวิว| |บำรุงหัวใจ| |แก้ไอ| |แก้ปวดมวลในท้อง| |ท้องร่วง| |รักษา อาการแน่น จุกเสียด ท้องอืด ท้องเฟ้อ| |ขับปัสสาวะ| |รักษาโรคบิด| |แก้บิดมูกเลือด| |[แก้]ปวดเบ่ง| |แก้ลำไส้ใหญ่อักเสบ| |บำรุงกำลัง| |ใช้ภายนอ…
	ฟ้าทะลายโจร/Andrographis paniculata	ประโยชน์ทางยา ใบ รสขม บดผสมน้ำมันพืชทาแผลน้ำร้อนลวก ไฟไหม้ ใช้ปนกับเพลี้ยใส่ลาบเพื่อเพิ่มความขม ใบสดนำมาเคี้ยวกินหรือต้มน้ำดื่มแก้อาการคออักเสบ เจ็บคอ เป็นยาขมเจริญอาหาร ในใบจะมีสารประกอบที่มีรสขมละลายน้ำได้อยู่ ซึ่งชาวอินเดียจะนำใบมาคั้นเอาน้ำผสมกับเครื่องเทศ เช่น พวกกระวาน อบเชย กานพลู ฯลฯ แล้วนำมาปั้นเป็นเมล็ดกลม ๆ เป็นยารักษาโรคที่มีอาการผิดปกติทางเดินอาหารในเด็ก เป็นยาดองเหล้า (Tincture) และ…	<|ประโยชน์ทางยา|><<|ใบ|>> /|[มี]รสขม| |บด| |ผสมน้ำมันพืช| |ทาแผลน้ำร้อนลวก ไฟไหม้| |ใช้ปนกับเพลี้ย| |ใส่ลาบเพื่อเพิ่มความขม| |ใบสดนำมาเคี้ยวกิน| |หรือต้มน้ำ| |ดื่ม| |แก้อาการคออักเสบ| |เจ็บคอ| |เป็นยาขมเจริญอาหาร| |ในใบจะมีสารประกอบ| |ที่มีรสขม| |ละลายน้ำได้อยู่| |ซึ่งชาวอินเดียจะนำใบมาคั้นเอาน้ำ| |ผสมกับเครื่องเทศ เช่น พวกกระวาน อบเชย กานพลู ฯลฯ| |แล้วนำมาปั้นเป็นเมล็ดกลม ๆ| |เป็นยารักษาโรค| |ที…
	ตะไคร้/Lemon grass	ประโยชน์ทางยา โคนกาบใบและลำต้น ใช้เป็นยาขับลม แก้ท้องอืดเฟ้อแน่นจุกเสียด ใบ รสหอมปร่า ใบสดใช้เป็นยาช่วยลดความดันโลหิต และแก้ไข้ ลำต้น รสหอมปร่า เป็นยาขับลม แก้โรคทางเดินปัสสาวะ แก้นิ่ว แก้ผมแตกปลาย แก้เบื่ออาหาร ทำให้เจริญอาหาร ขับเหงื่อ แก้ดับกลิ่นคาวในอาหาร ทั้งต้น รสหอมปร่า แก้ปวดท้อง รักษาโรคหืด แก้อหิวาตกโรค แก้โรคระบบทางเดินปัสสาวะ หรือใช้ทำเป็นยานวด ใช้ร่วมกับสมุนไพรอื่นรักษาโรค เช่น เป็นย…	<|ประโยชน์ทางยา|><<|โคนกาบใบและลำต้น|>> /|ใช้เป็นยาขับลม| |แก้ท้องอืดเฟ้อแน่นจุกเสียด|/<<>><<|ใบ|>> /|รสหอมปร่า| |ใบสดใช้เป็นยาช่วยลดความดันโลหิต| |และแก้ไข้|/<<>><<|ลำต้น|>> /|[มี]รสหอมปร่า| |เป็นยาขับลม| |แก้โรคทางเดินปัสสาวะ| |แก้นิ่ว| |แก้ผมแตกปลาย| |แก้เบื่ออาหาร| |ทำให้เจริญอาหาร| |ขับเหงื่อ| |แก้ดับกลิ่นคาวในอาหาร|/<<>><<|ทั้งต้น|>> /|[มี]รสหอมปร่า| |แก้ปวดท้อง| |รักษาโรคหืด| |แก้อหิวาตกโร…
	ขิง/Ginger	ประโยชน์ทางยา เหง้าแก่สด ยาแก้อาเจียน ยาขมเจริญอาหาร ยาแก้ท้องขึ้น ท้องอืดเฟ้อ ขับลม แก้ไอ ขับเสมหะ บำรุงธาตุ สามารถต้านการเกิดแผลในกระเพาะอาหาร ลดอาการจุกเสียดได้ดี มีฤทธิ์ในการขับน้ำดี เพื่อย่อยอาหาร แก้ปากคอเปื่อย แก้ท้องผูก ลดความดันโลหิต ต้น ขับผายลม แก้จุกเสียดแน่นเฟ้อ แก้นิ่ว บำรุงไฟธาตุ แก้คอเปื่อย ช่วยย่อยอาหาร ฆ่าพยาธิ แก้โรคตา แก้บิด แก้ลมป่วง แก้ท้องร่วงอย่างแรง แก้อาเจียน ใบ รสเผ็ดร้…	<|ประโยชน์ทางยา|><<|เหง้าแก่สด|>> /|ยาแก้อาเจียน| |ยาขมเจริญอาหาร| |ยาแก้ท้องขึ้น| |[แก้]ท้องอืดเฟ้อ| |ขับลม| |แก้ไอ| |ขับเสมหะ| |บำรุงธาตุ| |สามารถต้านการเกิดแผลในกระเพาะอาหาร| |ลดอาการจุกเสียดได้ดี| |มีฤทธิ์ในการขับน้ำดี เพื่อย่อยอาหาร| |แก้ปากคอเปื่อย| |แก้ท้องผูก| |ลดความดันโลหิต|/<<>><<|ต้น|>> /|ขับผายลม| |แก้จุกเสียดแน่นเฟ้อ| |แก้นิ่ว| |บำรุงไฟธาตุ| |แก้คอเปื่อย| |ช่วยย่อยอาหาร| |ฆ่าพยาธิ| …
	กะเพรา/Holy basil	ประโยชน์ทางยา ใบหรือทั้งต้น ใช้เป็นยาขับลมแก้ปวดท้อง ท้องเสีย และคลื่นไส้อาเจียน นิยมใช้กะเพราแดงมากกว่ากะเพราขาว ใบ รสเผ็ดร้อน ต้มเอาน้ำดื่มเป็นยาขับลม แก้ท้องอืด ท้องเฟ้อ แก้ปวดท้อง บำรุงธาตุ แก้จุกเสียด แก้ลมตานซาง แก้คลื่นเหียนอาเจียน น้ำคั้นจากใบใช้เป็นยาขับเสมหะ ขับเหงื่อ ขับน้ำดี ช่วยย่อยไขมัน น้ำคั้นจากใบใช้ทาภายนอกแก้โรคผิวหนัง กลาก เกลื้อน รักษาหูด หยอดหูแก้อาการปวดหู ใบแห้งใช้ชงดื่มกับ…	<|ประโยชน์ทางยา|><<|ใบหรือทั้งต้น|>> /|ใช้เป็นยาขับลม| |แก้ปวดท้อง| |[แก้]ท้องเสีย| |และ[แก้]คลื่นไส้อาเจียน| |นิยมใช้กะเพราแดงมากกว่ากะเพราขาว|/<<>><<|ใบ|>> /|[มี]รสเผ็ดร้อน| |ต้มเอาน้ำ| |ดื่ม| |เป็นยาขับลม| |แก้ท้องอืด| |[]ท้องเฟ้อ| |แก้ปวดท้อง| |บำรุงธาตุ| |แก้จุกเสียด| |แก้ลมตานซาง| |แก้คลื่นเหียนอาเจียน| |น้ำคั้นจากใบใช้เป็นยาขับเสมหะ| |ขับเหงื่อ| |ขับน้ำดี| |ช่วยย่อยไขมัน| |น้ำคั้นจากใบใช้ท…
	เสลดพังพอน/Philippine violet	ประโยชน์ทางยา ใบ ตำผสมน้ำข้าวสารใช้พอกหรือทาแผลแมลงกัดต่อยเพื่อแก้พิษ หรือเป็นลมพิษ หรือต้มกิน ช่วยลดอาการจากไข้มาลาเรีย มีรสขมมาก แก้พิษแมลงสัตว์กัดต่อย เช่น ผึ้ง แมงป่อง ตะขาบ แผลฟกช้ำจากการกระทบกระแทก หรือแผลมีเลือดออก ให้ใช้ใบตำพอกหรือผสมกับเหล้าตำพอก และอาจจะใช้ต้มน้ำกินทำให้เลือดไหลเวียนดี ต้น ปลูกเป็นแนวรั้วป้องกันงู ราก รสจืดเย็น ฝนกับสุราดื่ม และทาแก้พิษงู แมลงสัตว์กัดต่อย	<|ประโยชน์ทางยา|><<|ใบ|>> /|ตำ| |ผสมน้ำข้าวสาร| |ใช้พอกหรือทาแผลแมลงกัดต่อย| |เพื่อแก้พิษ| |หรือ[แก้]เป็นลมพิษ| |หรือต้ม| |กิน| |ช่วยลดอาการจากไข้มาลาเรีย| |มีรสขมมาก| |แก้พิษแมลงสัตว์กัดต่อย| |เช่น ผึ้ง แมงป่อง ตะขาบ| |[แก้]แผลฟกช้ำจากการกระทบกระแทก| |หรือ[แก้]แผลมีเลือดออก| |ให้ใช้ใบ| |ตำพอก| |หรือผสมกับเหล้า| |ตำ| |พอก| |และอาจจะใช้ต้มน้ำ| |กิน| |ทำให้เลือดไหลเวียนดี|/<<>><<|ต้น|>> /|ปลูกเป็นแ…
	ขมิ้นชัน/Turmeric	ประโยชน์ทางยา เหง้าหรือลำต้นใต้ดิน รสฝาดหวานเอียน กลิ่นหอม มีฤทธิ์ในการฆ่าเชื้อแบคทีเรีย เชื้อรา ลดการอักเสบ และ มีฤทธิ์ในการขับน้ำดี และในเหง้ายังมีสารสีเหลืองส้มที่เรียกว่าเคอร์คูมิน สารสกัดด้วยเอทานอลจากเหง้าสดมีฤทธิ์ยับยั้งเอนไซม์ไทโรซิเนสและต้านอนุมูลอิสระขมิ้นชันไม่มีพิษเฉียบพลัน มีความปลอดภัยสูง ขมิ้นชัน เพิ่มภูมิคุ้มกัน อิมมูโนโกลบูลิน ชนิดจี (IgG) และลดความไวต่อตัวกระตุ้น ช่วยขยายหลอดลม …	<|ประโยชน์ทางยา|><<|เหง้าหรือลำต้นใต้ดิน|>> /|[มี]รสฝาดหวานเอียน| |กลิ่นหอม| |มีฤทธิ์ในการฆ่าเชื้อแบคทีเรีย เชื้อรา| |ลดการอักเสบ| |และมีฤทธิ์ในการขับน้ำดี| |และในเหง้ายังมีสารสีเหลืองส้ม| |ที่เรียกว่าเคอร์คูมิน| |สารสกัดด้วยเอทานอลจากเหง้าสดมีฤทธิ์ยับยั้งเอนไซม์ไทโรซิเนส| |และต้านอนุมูลอิสระ| |ขมิ้นชันไม่มีพิษเฉียบพลัน| |มีความปลอดภัยสูง| |ขมิ้นชัน เพิ่มภูมิคุ้มกัน อิมมูโนโกลบูลิน ชนิดจี (IgG) |…
	กระเทียม/Garlic	ประโยชน์ทางยา หัว รสร้อนฉุน มีน้ำมันหอมระเหยใช้เป็นยาขับเหงื่อ ขับปัสสาวะและขับเสมหะ น้ำกระเทียมผสมน้ำ 4 เท่า ใช้ใส่แผลที่เป็นหนอง น้ำคั้นจากกระเทียมหยอดใส่หูแก้หูอื้อ หูตึง ทาแผลแก้กลากเกลื้อน ขับลมในลำไส้ แก้ท้องขึ้น แน่นท้องจุกเสียด ท้องเฟ้อ ขับพยาธิในลำไส้ แก้หืด อัมพาต โขลกสระผมป้องกันผมหงอก ทาถูนวดแก้อาการชักกระตุกของเด็ก โขลกพอกหัวเหน่าแก้ขัดเบา โขลกกับน้ำส้มกวาดคอแก้อักเสบเสียงแหบแห้ง แก้…	<|ประโยชน์ทางยา|><<|หัว|>> /|[มี]รสร้อนฉุน| |มีน้ำมันหอมระเหย| |ใช้เป็นยาขับเหงื่อ| |ขับปัสสาวะ| |และขับเสมหะ| |น้ำกระเทียมผสมน้ำ 4 เท่า| |ใช้ใส่แผล| |ที่เป็นหนอง| |น้ำคั้นจากกระเทียมหยอดใส่หู| |แก้หูอื้อ| |[แก้]หูตึง| |ทาแผล| |แก้กลากเกลื้อน| |ขับลมในลำไส้| |แก้ท้องขึ้น| |[แก้]แน่นท้องจุกเสียด| |[แก้]ท้องเฟ้อ| |ขับพยาธิในลำไส้| |แก้หืด| |[แก้]อัมพาต| |โขลก| |สระผม| |ป้องกันผมหงอก| |ทาถูนวด| |แก้…
	มะนาว/Common lime	ประโยชน์ทางยา ใบ รสปร่า ต้มน้ำดื่มเป็นยาแก้ไอ กัดฟอกหรือละลายเสมหะ แก้ท้องอืด ท้องเสีย ช่วยขับลม ช่วยเจริญอาหาร ฟอกโลหิตระดูหรือประจำเดือน น้ำในลูก รสเปรี้ยว คั้นเอาน้ำดื่มเป็นยาแก้กระหายน้ำ แก้ร้อนใน บำรุงธาตุ เจริญอาหาร แก้เลือดออกตามไรฟัน และถ่ายพยาธิ ผสมเกลือและน้ำตาลทรายแดง จิบแก้เสมหะ แก้ไอ แก้เลือดออกตามไรฟัน ล้างเสมหะในคอ กัดเถาดานในท้อง ฟอกโลหิต ใช้เป็นน้ำกระสายผสมยากวาดคอเด็ก แก้ไข้หวัด…	<|ประโยชน์ทางยา|><<|ใบ|>> /|[มี]รสปร่า| |ต้มน้ำ| |ดื่ม| |เป็นยาแก้ไอ| |กัดฟอกหรือละลายเสมหะ| |แก้ท้องอืด| |[แก้]ท้องเสีย| |ช่วยขับลม| |ช่วยเจริญอาหาร| |ฟอกโลหิตระดูหรือประจำเดือน|/<<>><<|น้ำในลูก|>> /|[มี]รสเปรี้ยว| |คั้นเอาน้ำ| |ดื่ม| |เป็นยาแก้กระหายน้ำ| |แก้ร้อนใน| |บำรุงธาตุ| |เจริญอาหาร| |แก้เลือดออกตามไรฟัน| |และถ่ายพยาธิ| |ผสมเกลือและน้ำตาลทรายแดง| |จิบแก้เสมหะ| |แก้ไอ| |แก้เลือดออกตามไรฟั…
	กานพลู/Clove, Clove tree	ประโยชน์ทางยา ใบ รสร้อน แก้ปวดมวน เปลือกต้น รสร้อนปร่า แก้ปวดท้อง แก้ลม คุมธาตุ ดอก รสเผ็ดร้อนปร่า เป็นยาแก้พิษโลหิต แก้ปวดท้อง แก้ลมเป็นเหน็บชา แก้พิษน้ำเหลือง แก้อุจจาระให้เป็นปกติ แก้เลือดออกตามไรฟัน แก้ปวดฟัน แก้หืด ละลายเสมหะ ดับกลิ่นปาก เป็นต้น ดอกเมื่อตากแห้งแล้วจะเป็นสีแดงน้ำตาล นำมากลั่นใช้ 0.12 - 0.3 กรัม จะเป็นยาแก้ท้องขึ้น ธาตุพิการ ขับผายลมในลำไส้ เป็นยาบำรุง ผล รสร้อนปร่า เป็นตัวช่ว…	<|ประโยชน์ทางยา|><<|ใบ|>> /|[มี]รสร้อน| |แก้ปวดมวน|/<<>><<|เปลือกต้น|>> /|[มี]รสร้อนปร่า| |แก้ปวดท้อง| |แก้ลม| |คุมธาตุ|/<<>><<|ดอก|>> /|[มี]รสเผ็ดร้อนปร่า| |เป็นยาแก้พิษโลหิต| |แก้ปวดท้อง| |แก้ลมเป็นเหน็บชา| |แก้พิษน้ำเหลือง| |แก้อุจจาระให้เป็นปกติ| |แก้เลือดออกตามไรฟัน| |แก้ปวดฟัน| |แก้หืด| |ละลายเสมหะ| |ดับกลิ่นปาก เป็นต้น| |ดอกเมื่อตากแห้งแล้ว| |จะเป็นสีแดงน้ำตาล| |นำมากลั่น| |ใช้ 0.12 - 0.3 …
	พริกไทย/Pepper	ประโยชน์ทางยา ใบ รสเผ็ดร้อน แก้ลม จุกเสียด แน่น แก้ปวดมวนท้อง เถา รสร้อน แก้อุระเสมหะหรือเสมหะในทรวงอก แก้อติสาร (อาการท้องร่วง อุจจาระเหม็นเน่า ถ่ายเป็นโลหิตจนลำไส้แตกทะลุ มีไข้แทรก) ดอก รสเผ็ดร้อน แก้ตาแดง เนื่องจากความดันโลหิตสูง ผลหรือเมล็ด รสเผ็ดร้อน แก้ลมอัมพฤกษ์ แก้ลมลั่นในท้อง บำรุงธาตุ แก้ท้องอืด ท้องเฟ้อ แก้เสมหะเฟื่อง แก้มุตกิด ราก รสร้อน ขับลมในลำไส้ แก้ปวดท้อง แก้ลมวิงเวียน ช่วยย่อยอ…	<|ประโยชน์ทางยา|><<|ใบ|>>/|[มี]รสเผ็ดร้อน| |แก้ลม| |จุกเสียด แน่น| |แก้ปวดมวนท้อง|/<<>><|เถา|>> /|[มี]รสร้อน| |แก้อุระเสมหะ| |หรือเสมหะในทรวงอก| |แก้อติสาร| (|อาการท้องร่วง| |อุจจาระเหม็นเน่า| |ถ่ายเป็นโลหิต| |จนลำไส้แตกทะลุ| |มีไข้แทรก|)/<<>><<|ดอก|>> /|[มี]รสเผ็ดร้อน| |แก้ตาแดง| |เนื่องจากความดันโลหิตสูง|/<<>><<|ผลหรือเมล็ด|>> /|[มี]รสเผ็ดร้อน| |แก้ลมอัมพฤกษ์| |แก้ลมลั่นในท้อง| |บำรุงธาตุ| |แก้…
http://www.rspg.or.th/plants_data/herbs/herbs_200.htm	กานพลู/Clove tree	สรรพคุณ เปลือกต้น - แก้ปวดท้อง แก้ลม คุมธาตุ ใบ - แก้ปวดมวน ดอกตูม - รับประทานขับลม ใช้แต่งกลิ่น ดอกกานพลูแห้ง ที่ยังไม่ได้สกัดเอาน้ำมันออก และมีกลิ่นหอมจัด มีน้ำมันหอมระเหยมาก รสเผ็ด ช่วยขับลม แก้อาการท้องอืด ท้องเฟ้อ ปวดท้อง และแน่นจุกเสียด แก้อุจจาระพิการ แก้โรคเหน็บชา แก้หืด แก้ไอ แก้น้ำเหลืองเสีย แก้เลือดเสีย ขับน้ำคาวปลา แก้ลม แก้ธาตุพิการ บำรุงธาตุ ขับเสมหะ แก้เสมหะเหนียว ขับผายลม ขับลมในล…	<|สรรพคุณ|><<|เปลือกต้น|>> /|-แก้ปวดท้อง| |แก้ลม| |คุมธาตุ|/<<>><<|ใบ|>> /|-แก้ปวดมวน|/<<>><<|ดอกตูม|>> /|-รับประทาน| |ขับลม| |ใช้แต่งกลิ่น| |ดอกกานพลูแห้ง| |ที่ยังไม่ได้สกัดเอาน้ำมันออก| |และมีกลิ่นหอมจัด| |มีน้ำมันหอมระเหยมาก| |[มี]รสเผ็ด| |ช่วยขับลม| |แก้อาการท้องอืด| |[แก้]ท้องเฟ้อ| |[แก้]ปวดท้อง| |และ[แก้]แน่นจุกเสียด| |แก้อุจจาระพิการ| |แก้โรคเหน็บชา| |แก้หืด| |แก้ไอ| |แก้น้ำเหลืองเสีย| |แก…
	พริกไทย/Black Pepper	สรรพคุณ ใบ - แก้ลมจุกเสียดแน่น ท้องอืดเฟ้อ ผล ผล ที่ยังไม่สุกนำมาเป็นเครื่องเทศ แต่งกลิ่นอาหาร เมล็ด -ขับลม ขับเสมหะ ขับเหงื่อ ขับปัสสาวะ บำรุงธาตุ อาหารไม่ย่อย ดอก - แก้ตาแดง ถนอมอาหารหลายชนิด เช่น มะม่วงดอง	<|สรรพคุณ|><<|ใบ|>>/|แก้ลมจุกเสียดแน่น| |[แก้]ท้องอืดเฟ้อ|/ <<>><<|ผล|>> /|ผลที่ยังไม่สุก| |นำมาเป็นเครื่องเทศ| |แต่งกลิ่นอาหาร|/<<>><<|เมล็ด|>> /|ขับลม| |ขับเสมหะ| |ขับเหงื่อ| |ขับปัสสาวะ| |บำรุงธาตุ| |อาหารไม่ย่อย|/<<>><<|ดอก|>> /|แก้ตาแดง| |ถนอมอาหารหลายชนิด| |เช่น มะม่วงดอง|/<<>><>
	โหระพา/Sweet Basil	สรรพคุณ ทั้งต้น - รสฉุน สุขุม ขับลม ทำให้เจริญอาหาร - แก้ปวดหัว หวัด ปวดกระเพาะอาหาร - จุกเสียดแน่น ท้องเสีย - ประจำเดือนผิดปกติ - ฟกช้ำจากหกล้ม หรือกระทบกระแทก งูกัด - ผดผื่นคัน มีน้ำเหลือง เมล็ด - รสชุ่ม เย็น สุขุม ถูกน้ำจะพองตัวเป็นเมือก - ใช้แก้ตาแดง มีขี้ตามาก ต้อตา - ใช้เป็นยาระบาย (ใช้เมล็ด 4-12 กรัม แช่น้ำเย็นจนพอง ผสมน้ำหวาน เติมน้ำแข็งรับประทาน) ราก - แก้เด็กเป็นแผล มีหนองเรื้อรัง	<|สรรพคุณ|><<|ทั้งต้น|>> /| [มี]รสฉุนสุขุม| |ขับลม| |ทำให้เจริญอาหาร| |แก้ปวดหัว| |[แก้]หวัด| |[แก้]ปวดกระเพาะอาหาร| | [แก้]จุกเสียดแน่น| |[แก้]ท้องเสีย| | [แก้]ประจำเดือนผิดปกติ| | [แก้]ฟกช้ำจากหกล้ม หรือกระทบกระแทก| |[แก้]งูกัด| | [แก้]ผดผื่นคัน มีน้ำเหลือง|/<<>><<|เมล็ด|>> /| [มี]รสชุ่ม เย็น สุขุม| |ถูกน้ำจะพองตัวเป็นเมือก| |ใช้แก้ตาแดง| |มีขี้ตามาก| |[แก้]ต้อตา| |ใช้เป็นยาระบาย| (|ใช้เมล็ด 4-…
	ไพล/Zingiber montanum	สรรพคุณ เหง้า - เป็นยาแก้ท้องขึ้น ท้องอืดเฟ้อ ขับลม - แก้บิด ท้องเดิน ขับประจำเดือนสตรี ทาแก้ฟกบวม แก้ผื่นคัน – เป็นยารักษาหืด – เป็นยากันเล็บถอด – ใช้ต้มน้ำอาบหลังคลอด น้ำคั้นจากเหง้า - รักษาอาการเคล็ดขัดยอก ฟกบวม แพลงช้ำเมื่อย หัว - ช่วยขับระดู ประจำเดือนสตรี เลือดร้าย แก้มุตกิตระดูขาว แก้อาเจียน แก้ปวดฟัน ดอก – ขับโลหิตกระจายเลือดเสีย ต้น - แก้ธาตุพิการ แก้อุจาระพิการ ใบ - แก้ไข้ ปวดเมื่อย แก้…	<|สรรพคุณ|><<|เหง้า}>> /|เป็นยาแก้ท้องขึ้น| |[แก้]ท้องอืดเฟ้อ| |ขับลม| |แก้บิด| |[แก้]ท้องเดิน| |ขับประจำเดือนสตรี| |ทา| |แก้ฟกช้ำบวม| |แก้ผื่นคัน| |เป็นยารักษาหืด| |เป็นยากันเล็บถอด| |-ใช้ต้มน้ำอาบหลังคลอด|/<<>><<|น้ำคั้นจากเหง้า|>> /|รักษาอาการเคล็ดขัดยอก| |[แก้]ฟกช้ำบวม| |[แก้]แพลงช้ำเมื่อย|/<<>><<|หัว|>> /|ช่วยขับระดู ประจำเดือนสตรี เลือดร้าย| |แก้มุตกิตระดูขาว| |แก้อาเจียน| |แก้ปวดฟัน|/<<>><…
	กระชาย/Kaempfer,Fingerroot	สรรพคุณ เหง้าใต้ดิน - มีรสเผ็ดร้อนขม แก้ปวดท้อง มวนในท้อง ท้องอืดท้องเฟ้อ บำรุงกำลัง บำรุงกำหนัด แก้กามตายด้าน เป็นยารักษาริดสีดวงทวาร เหง้าและราก - แก้บิดมูกเลือด เป็นยาขับปัสสาวะ แก้ปัสสาวะพิการ ใช้เป็นยาภายนอกรักษาขี้กลาก ใบ - บำรุงธาตุ แก้โรคในปาก คอ แก้โลหิตเป็นพิษ ถอนพิษต่างๆ	<|สรรพคุณ|><<|เหง้าใต้ดิน|>> /|มีรสเผ็ดร้อนขม| |แก้ปวดท้อง มวนในท้อง| |[แก้]ท้องอืดท้องเฟ้อ| |บำรุงกำลัง| |บำรุงกำหนัด| |แก้กามตายด้าน| |เป็นยารักษาริดสีดวงทวาร|/<<>><<|เหง้าและราก|>> /|แก้บิดมูกเลือด| |เป็นยาขับปัสสาวะ| |แก้ปัสสาวะพิการ| |ใช้เป็นยาภายนอกรักษาขี้กลาก|/<<>><<|ใบ|>> /|บำรุงธาตุ| |แก้โรคในปาก คอ| |แก้โลหิตเป็นพิษ| |ถอนพิษต่างๆ|/<<>><>
	ฝรั่ง/Guava	สรรพคุณ ฝรั่งมีสารแทนนินอยู่มาก สารนี้มีฤทธิ์ฝาดสมานน้ำมันหอมระเหยในใบฝรั่ง สารแทนนินในฝรั่งยังยับยั้งการลุกลามของเชื้อโรค ช่วยสมานท้องและลำไส้ โดยช่วยลดอาการอักเสบของกระเพาะลำไส้ และช่วยลดอาการคลื่นไส้อาเจียน และยังช่วยอาการเกร็งตัวของลำไส้ ทำให้อาการปวดท้องบรรเทาลงได้ แก้ปวดเบ่ง ใบ - แก้ท้องเสีย ท้องร่วง ท้องเดิน (ที่ไม่ใช่บิด หรืออหิวาตกโรค) เป็นยาห้ามเลือด ใส่แผลสด ใช้ใบ 2-3 ใบเคี้ยวๆ ระงับกล…	<|สรรพคุณ|>/|ฝรั่งมีสารแทนนินอยู่มาก| |สารนี้มีฤทธิ์ฝาดสมาน| |น้ำมันหอมระเหยในใบฝรั่ง| |สารแทนนินในฝรั่งยังยับยั้งการลุกลามของเชื้อโรค| |ช่วยสมานท้องและลำไส้| |โดยช่วยลดอาการอักเสบของกระเพาะลำไส้| |และช่วยลดอาการคลื่นไส้| |อาเจียน| |และยังช่วยอาการเกร็งตัวของลำไส้| |ทำให้อาการปวดท้องบรรเทาลงได้| |แก้ปวดเบ่ง|/<<>><<|ใบ|>> /|แก้ท้องเสีย| |[แก้]ท้องร่วง| |[แก้]ท้องเดิน| (|ที่ไม่ใช่บิด หรืออหิวาตกโรค…
	มะนาว/Common lime	สรรพคุณ น้ำมะนาว - แก้โรคลักปิดลักเปิด (เลือดออกตามไรฟัน) ทำอาหาร ขับเสมหะ ฟอกโลหิต ทำให้ผิวนุ่มนวล แก้ซาง บำรุงเสียง บำรุงโลหิต ขับระดู แก้เล็บขบ แก้ขาลาย จิบแก้ไอ ดับกลิ่นเหล้า ฆ่าพยาธิในท้อง รักษาผม ขับลม รักษาลมพิษ แก้ริดสีดวง แก้ระดูขาว แก้พิษยางน่อง แก้ไข้ แก้ไข้กาฬ แก้ฝี แก้ปวด แก้อักเสบ ราก - กระทุ้งพิษไข้ ถอนพิษสำแดง แก้สติหลงลืม แก้ไข้ แก้ไข้กาฬ แก้ฝี แก้ปวด แก้อักเสบ ถอนพิษไข้ กลับไข้ซ…	<|สรรพคุณ|><<|น้ำมะนาว|>> /|-แก้โรคลักปิดลักเปิด| (|เลือดออกตามไรฟัน|) |ทำอาหาร| |ขับเสมหะ| |ฟอกโลหิต| |ทำให้ผิวนุ่มนวล| |แก้ซาง| |บำรุงเสียง| |บำรุงโลหิต| |ขับระดู| |แก้เล็บขบ| |แก้ขาลาย| |จิบ| |แก้ไอ| |ดับกลิ่นเหล้า| |ฆ่าพยาธิในท้อง| |รักษาผม| |ขับลม| |รักษาลมพิษ| |แก้ริดสีดวง| |แก้ระดูขาว| |แก้พิษยางน่อง| |แก้ไข้| |แก้ไข้กาฬ| |แก้ฝี| |แก้ปวด| |แก้อักเสบ|/<<>><<|ราก|>> /|กระทุ้งพิษไข้| |ถอนพิษส…
	มะกรูด/Leech lime	สรรพคุณ ราก - กระทุ้งพิษ แก้ฝีภายในและแก้เสมหะเป็นพิษ ใบ – มีน้ำมันหอมระเหย ผล, น้ำคั้นจากผล - ใช้แต่งกลิ่น สระผมรักษาชันนะตุ รังแค ทำให้ผมสะอาด ผิวจากผล - ปรุงเป็นยาขับลมในลำไส้ แก้แน่น - เป็นยาบำรุงหัวใจ	<|สรรพคุณ|><<|ราก|>> /|กระทุ้งพิษ| |แก้ฝีภายใน| |และแก้เสมหะเป็นพิษ|/<<>><<|ใบ|>> /|มีน้ำมันหอมระเหย|/<<>><<|ผล, น้ำคั้นจากผล|>> /|ใช้แต่งกลิ่น| |สระผม| |รักษาชันนะตุ รังแค| |ทำให้ผมสะอาด|/<<>><<|ผิวจากผล|>>/|ปรุงเป็นยาขับลมในลำไส้| |แก้แน่น||เป็นยาบำรุงหัวใจ|/<<>><>
	บอระเพ็ด/Tinospora cordifolia	สรรพคุณ ราก - แก้ไข้เหนือ ไข้สันนิบาต แก้ไข้พิษ ไข้จับสั่น ดับพิษร้อน ถอนพิษไข้ เจริญอาหาร ต้น - แก้ไข้ แก้ไข้พิษ แก้ไข้กาฬ แก้ไข้เหนือ บำรุงกำลัง บำรุงธาตุ แก้อาการแทรกซ้อน ขณะที่เป็นไข้ทรพิษ แก้ไข้เพื่อโลหิต แก้เลือดพิการ แก้ร้อนในกระหายน้ำ แก้สะอึก แก้พิษฝีดาษ เป็นยาขมเจริญอาหาร เป็นยาอายุวัฒนะ ใบ - แก้ไข้ แก้ไข้พิษ แก้ไข้กาฬ แก้ไข้จับสั่น ขับพยาธิ แก้ปวดฝี บำรุงธาตุ ยาลดความร้อน ทำให้ผิวพรรณผ…	<|สรรพคุณ|><<|ราก|>> /|แก้ไข้เหนือ ไข้สันนิบาต| |แก้ไข้พิษ| |[แก้]ไข้จับสั่น| |ดับพิษร้อน| |ถอนพิษไข้| |เจริญอาหาร|/<<><<|ต้น|>> /|แก้ไข้| |แก้ไข้พิษ| |แก้ไข้กาฬ| |แก้ไข้เหนือ| |บำรุงกำลัง| |บำรุงธาตุ| |แก้อาการแทรกซ้อน| |ขณะที่เป็นไข้ทรพิษ| |แก้ไข้เพื่อโลหิต| |แก้เลือดพิการ| |แก้ร้อนในกระหายน้ำ| |แก้สะอึก| |แก้พิษฝีดาษ| |เป็นยาขมเจริญอาหาร| |เป็นยาอายุวัฒนะ|/<<>><<|ใบ|>> /|แก้ไข้| |แก้ไข้พิษ| |แ…
	ว่านหางจระเข้/Aloe vera	สรรพคุณ ใบ - รสเย็น ตำผสมสุรา พอกฝี ทั้งต้น - รสเย็น ดองสุราดื่มขับน้ำคาวปลา ราก - รสขม รับประทานถ่ายโรคหนองใน แก้มุตกิด ยางในใบ – เป็นยาระบาย น้ำวุ้นจากใบ - ล้างด้วยน้ำสะอาด ฝานบางๆ รักษาแผลสดภายนอก น้ำร้อนลวก ไฟไหม้ ทำให้แผลเป็นจางลง ดับพิษร้อน ทาผิวป้องกันและรักษาอาการไหม้จากแสงแดด ทาผิวรักษาสิวฝ้า และขจัดรอยแผลเป็น เนื้อวุ้น - เหน็บทวาร รักษาริดสีดวงทวาร เหง้า - ต้มรับประทานแก้หนองใน โรคมุตกิด	<|สรรพคุณ|><<|ใบ|>> /|[มี]รสเย็น| |ตำผสมสุรา| |พอกฝี|/<<>><<|ทั้งต้น|>> /|[มี]รสเย็น| |ดองสุรา| |ดื่ม| |ขับน้ำคาวปลา|/<<>><<|ราก|>> /|[มี]รสขม| |รับประทาน| |ถ่ายโรคหนองใน| |แก้มุตกิด|/<<>><<|ยางในใบ|>> /|เป็นยาระบาย|/<<>><<|น้ำวุ้นจากใบ|>> /|ล้างด้วยน้ำสะอาด| |ฝานบางๆ| |รักษาแผลสดภายนอก| |น้ำร้อนลวก| |ไฟไหม้| |ทำให้แผลเป็นจางลง| |ดับพิษร้อน| |ทาผิวป้องกัน| |และรักษาอาการไหม้จากแสงแดด| |ทาผิว| |รั…
https://medplant.mahidol.ac.th/pubhealth/index.asp	ข่า/Greater Galanga	สรรพคุณ เหง้า - รักษาอาการแน่นจุกเสียด	<|สรรพคุณ|> <<|เหง้า|>> /|-รักษาอาการแน่นจุกเสียด|/<<>>
		ฤทธิ์ทางเภสัชวิทยา - ฤทธิ์ลดการบีบตัวของลำไส้ ฤทธิ์ขับน้ำดี ช่วยย่อยอาหารได้	<|ฤทธิ์ทางเภสัชวิทยา|>/|ฤทธิ์ลดการบีบตัวของลำไส้| |ฤทธิ์ขับน้ำดี| |ช่วยย่อยอาหารได้ |/
		- ฤทธิ์ขับลม น้ำมันหอมระเหยจากเหง้าข่ามีฤทธิ์ขับลม ฤทธิ์ลดการอักเสบ ฤทธิ์ยับยั้งแผลในกระเพาะอาหาร ฤทธิ์ต้านเชื้อจุลชีพ	/| ฤทธิ์ขับลม| |น้ำมันหอมระเหยจากเหง้าข่า| |มีฤทธิ์ขับม| |ฤทธิ์ ลดการอักเสบ| |ฤทธิ์ ยับยั้งแผลในกระเพาะอาหาร| |ฤทธิ์ต้านเชื้อจุลชีพ|/<>
	กะเพรา/Holy basil	สรรพคุณ ใบ- ขับลม	<|สรรพคุณ|><<|ใบ|>> /|ขับ| |ลม|/<<>>
		ฤทธิ์ทางเภสัชวิทยา - ฤทธิ์ขับลม กะเพรามีน้ำมันหอมระเหยซึ่งมีฤทธิ์ขับลม eugenol ในน้ำมันหอมระเหยมีฤทธิ์ยับยั้งแบคทีเรียที่ทำให้ท้องเสีย	<|ฤทธิ์ทางเภสัชวิทยา|> /|ฤทธิ์ขับลม| |กะเพรามีน้ำมันหอมระเหย| |ซึ่งมีฤทธิ์ขับลม| |eugenolในน้ำมันหอมระเหยมีฤทธิ์ยับยั้งแบคทีเรีย| |ที่ทำให้ท้องเสีย|/
		- ฤทธิ์ต้านการเกิดแผลในกระเพาะอาหาร ฤทธิ์ลดการบีบตัวของลำไส้ ฤทธิ์ขับน้ำดี ฤทธิ์ลดการอักเสบ ฤทธิ์แก้ปวด ลดไข้ ฤทธิ์ต่อระบบประสาทส่วนกลาง ฤทธิ์ปกป้องตับ	/| ฤทธิ์ต้านการเกิดแผลในกระเพาะอาหาร| |ฤทธิ์ลดการบีบตัวของลำไส้| |ฤทธิ์ขับน้ำดี| |ฤทธิ์ลดการอักเสบ| |ฤทธิ์แก้ปวด| |[ฤทธิ์]ลดข้| |ฤทธิ์ต่อระบบประสาทส่วนกลาง| |ฤทธิ์ ปกป้อ ตับ|/
		- ฤทธิ์ต้านแบคทีเรีย ฤทธิ์ต้านอนุมูลอิสระ ฤทธิ์ต่อหัวใจและหลอดเลือด ลดน้ำตาลในเลือด ฤทธิ์ต้านมะเร็ง, ฤทธิ์กระตุ้นภูมิคุ้มกัน	/| ฤทธิ์ต้านแบคทีเรีย| |ฤทธิ์ต้านอนุมูลอิสระ| |ฤทธิ์ต่อหัวใจและหลอดเลือด| |[ฤทธิ์]ลดน้ำตาลในเลือด| |ฤทธิ์ต้านมะเร็ง| |ฤทธิ์กระตุ้นภูมิคุ้มกัน|/<<>>
	ขมิ้น/Turmeric	สรรพคุณ เหง้าใต้ดินบดเป็นผง รักษาแผล แมลงกัดต่อย กลากเกลื้อน ป้องกันและรักษาแผลในกระเพาะอาหาร รักษาอาการท้องเสีย	<|สรรพคุณ|><<|เหง้าใต้ดิน|>> /|บดเป็นผง| |รักษาแผล แมลง กัด ต่อย| |[รักษา]กลากเกลื้อน| |ป้องกันและรักษาแผลในกระเพาะอาหาร| |รักษาอาการท้องเสีย|/<<>>
		ฤทธิ์ทางเภสัชวิทยา - ฤทธิ์ต้านการเกิดแผลและสมานแผลในกระเพาะอาหาร และฤทธิ์อื่นๆ ต่อระบบทางเดินอาหาร ขมิ้นมีฤทธิ์สมานแผลในกระเพาะอาหาร โดยเร่งการเจริญเติบโตของเนื้อเยื่อบริเวณที่เป็นแผล ทำให้แผลหายเร็วขึ้น กระตุ้นการหลั่ง mucin มาเคลือบกระเพาะอาหารและยับยั้งการหลั่งน้ำย่อยต่าง ๆ	<|ฤทธิ์ทางเภสัชวิทยา|>/| ฤทธิ์ต้านการเกิดแผล| |และสมานแผลในกระเพาะอาหาร| |และฤทธิ์อื่นๆต่อระบบทางเดินอาหาร| |ขมิ้นมีฤทธิ์สมานแผลในกระเพาะอาหาร| |โดยเร่งการเจริญเติบโตของเนื้อเยื่อบริเวณที่เป็นแผล| |ทำให้แผลหายเร็วขึ้น| |[ฤทธิ์]กระตุ้นการหลั่ง mucin มาเคลือบกระเพาะอาหาร| |และ[ฤทธิ์]ยับยั้งการหลั่งน้ำย่อยต่าง ๆ|/
		- ฤทธิ์ลดการอักเสบ ฤทธิ์ต้าน เชื้อจุลชีพ ฤทธิ์ต้านการแพ้ ฤทธิ์สมานแผล	/| ฤทธิ์ลดการอักเสบ| |ฤทธิ์ต้านเชื้อจุลชีพ| |ฤทธิ์ต้านการแพ้| |ฤทธิ์สมานแผล|/<>
	ฟ้าทะลายโจร/Andrographis paniculata	สรรพคุณ ใบ รักษาท้องเสีย ไอ เจ็บคอ ฝี	<|สรรพคุณ|><<|ใบ|>>/|รักษาท้องเสีย| |[รักษา]ไอ| |[รักษา]เจ็บคอ| |[รักษา]ฝี|/<<>>
		ฤทธิ์ทางเภสัชวิทยา - ฤทธิ์ต่อระบบทางเดินอาหาร ช่วยรักษาอาการท้องเสีย ฤทธิ์ต่อระบบทางเดินหายใจ ช่วยรักษาอาการไอ เจ็บคอ ป้องกันและบรรเทาหวัด	<|ฤทธิ์ทางเภสัชวิทยา|>/| ฤทธิ์ต่อระบบทางเดินอาหาร| |ช่วยรักษาอาการท้องเสีย| |ฤทธิ์ต่อระบบทางเดินหายใจ| |ช่วยรักษาอาการไอเจ็บคอ| |ป้องกันและบรรเทาหวัด|/
		จากการศึกษาการใช้ฟ้าทะลายโจรเพื่อรักษาอาการไข้และเจ็บคอเปรียบเทียบกับยาลดไข้พาราเซตามอล พบว่ากลุ่มที่ได้รับฟ้าทะลายโจรขนาด 6 กรัมต่อวัน จะมีอาการไข้และการเจ็บคอลดลงในวันที่ 3 ซึ่งดีกว่ากลุ่มที่ได้รับฟ้าทะลายโจร 3 กรัม/วัน หรือได้รับพาราเซตามอล แต่การติดตามผลเมื่อหลัง 7 วันพบว่าผลการรักษาไม่ต่างกัน (29) และฟ้าทะลายโจรไม่ให้ผลต้านเชื้อแบคทีเรียที่เป็นสาเหตุของการเจ็บคอ	/|จากการศึกษาการใช้ฟ้าทะลายโจรเพื่อรักษาอาการไข้และเจ็บคอเปรียบเทียบกับยาลดไข้พาราเซตามอล| |พบว่ากลุ่ม |ที่ได้รับฟ้าทะลายโจรขนาด 6 กรัมต่อวัน| จะมีอาการไข้และการเจ็บคอลดลง ใน วันที่ 3| |ซึ่ง ดีกว่า กลุ่ม |ที่ได้รับฟ้าทะลายโจร 3 กรัม/วัน| |หรือได้รับพาราเซตามอล|| |แต่การติดตามผลเมื่อหลัง 7 วัน| |พบว่าผลการรักษาไม่ต่างกัน| |และฟ้าทะลายโจรไม่ให้ผลต้านเชื้อแบคทีเรีย |ที่เป็นสาเหตุของการเจ็บคอ||/<>
	ไพล	สรรพคุณ ส่วนเหง้าและน้ำมัน รักษาอาการบวม ฟกช้ำและอักเสบ	<|สรรพคุณ|><<|เหง้าและน้ำมัน |>>/|รักษาอาการบวม ฟกช้ำ และอักเสบ|/<<>>
		ฤทธิ์ทางเภสัชวิทยา - ฤทธิ์ลดการอักเสบ เมื่อทดลองนำครีมไพล (ไพลจีซาล) ที่มีส่วนผสมของน้ำมันไพลร้อยละ 14 ไปใช้ในผู้ป่วยข้อเท้าแพลง โดยให้ทาวันละสองครั้ง พบว่าสามารถลดการปวดบวมได้มากกว่ากลุ่มควบคุมเมื่อใช้ไปได้ 4 วัน	<|ฤทธิ์ทางเภสัชวิทยา|>/|ฤทธิ์ลดการอักเสบ| |เมื่อทดลองนำครีมไพล (ไพลจีซาล) |ที่มีส่วนผสมของน้ำมันไพลร้อยละ 14| ไปใช้ในผู้ป่วยข้อเท้าแพลง| |โดยให้ทาวันละสองครั้ง| |พบว่าสามารถลดการปวดบวมได้มากกว่ากลุ่มควบคุม| |เมื่อใช้ไปได้ 4 วัน|/
		- ฤทธิ์เป็นยาชาเฉพาะที่ น้ำคั้นหัวไพลมีฤทธิ์เป็นยาชาเฉพาะที่ และช่วยลดอาการปวด	/| ฤทธิ์เป็นยาชาเฉพาะที่| |น้ำคั้นหัวไพลมีฤทธิ์เป็นยาชาเฉพาะที่| |และช่วยลดอาการปวด|/
		- ฤทธิ์ต้านฮีสตามีน มีการทดสอบฤทธิ์ต้านฮีสตามีนของไพลในผู้ป่วยเด็กโรคหืด โดยฉีดฮีสตามีนที่แขนซ้ายก่อนได้รับยา และฉีดที่แขนขวาอีกครั้งหลังการให้กินไพลแห้งบด ทำการวัดรอยนูนแดงที่เกิดขึ้นหลังฉีดฮีสตามีน 15 นาทีเปรียบเทียบระหว่างแขนทั้งสองข้าง พบว่าไพลมีฤทธิ์ต้านฮีสตามีนโดยสามารถลดขนาดของตุ่มนูนที่เกิดจากการฉีดด้วยฮีสตามีนได้อย่างมีนัยสำคัญ	/| ฤทธิ์ต้านฮีสตามีน| |มีการทดสอบฤทธิ์ต้านฮีสตามีนของไพลในผู้ป่วยเด็กโรคหืด| |โดยฉีดฮีสตามีนที่แขนซ้าย| |ก่อนได้รับยา| |และฉีดที่แขนขวาอีกครั้ง| |หลังการให้กินไพลแห้งบด| |ทำการวัดรอยนูนแดง |ที่เกิดขึ้น| |หลังฉีดฮีสตามีน 15 นาที| เปรียบเทียบระหว่างแขนทั้งสองข้าง| |พบว่าไพลมีฤทธิ์ต้านฮีสตามีน| |โดยสามารถลดขนาดของตุ่มนูน |ที่เกิดจากการฉีดด้วยฮีสตามีน| ได้อย่างมีนัยสำคัญ|/
		- ฤทธิ์แก้ปวด ฤทธิ์ต้านแบคทีเรีย ฤทธิ์ต้านเชื้อรา ฤทธิ์ต้านการหดเกร็งของกล้ามเนื้อเรียบ	/| ฤทธิ์แก้ปวด| |ฤทธิ์ต้านแบคทีเรีย| |ฤทธิ์ต้านเชื้อรา| |ฤทธิ์ต้านการหดเกร็งของกล้ามเนื้อเรียบ|/<>
	บัวบก/Asiatic pennywort	“บัวบก ผักพื้นบ้านบํารุงสมอง" พิชานันท์ ลีแก้ว สํานักงานข้อมูลสมุนไพร คณะเภสัชศาสตร์มหาวิทยาลัยมหิดล	<Topic Name>“บัวบก ผักพื้นบ้านบํารุงสมอง<><Author Name>พิชานันท์ ลีแก้ว<><affiliation> สํานักงานข้อมูลสมุนไพร คณะเภสัชศาสตร์มหาวิทยาลัยมหิดล<>
		บัวบก (Centella asiatica (L.) Urb.) เป็นพืชสมุนไพรพื้นบ้านของไทยและของประเทศในเขตร้อน ถึงอบอุ่น มีข้อบ่งใช้ทางการแพทย์แผนโบราณอย่างกว้างขวาง และจากการรวบรวมข้อมูลงานวิจัยพบว่า มี การศึกษาฤทธิ์ทางเภสัชวิทยาของบัวบก รวมถึงการศึกษาวิจัยทางคลินิกจํานวนมาก โดยสารออกฤทธิ์สําคัญที่ พบในบัวบกเป็นสารกลุ่มไตรเทอร์พีน (triterpenes) ได้แก่ madecassic acid, asiatic acid, asiaticoside และ madecassoside เป็นต้น…	<|บัวบก (Centella asiatica (L.) Urb.)>|เป็นพืชสมุนไพรพื้นบ้านของไทยและของประเทศในเขตร้อน ถึงอบอุ่น| |มีข้อบ่งใช้ทางการแพทย์แผนโบราณอย่างกว้างขวาง| |และจากการรวบรวมข้อมูลงานวิจัยพบว่า มีการศึกษาฤทธิ์ทางเภสัชวิทยาของบัวบก รวมถึงการศึกษาวิจัยทางคลินิกจํานวนมาก| |โดยสารออกฤทธิ์สําคัญ |ที่พบในบัวบกเป็นสารกลุ่มไตรเทอร์พีน (triterpenes)| ได้แก่ madecassic acid, asiatic acid, asiaticoside และ madecassosi…
		ฤทธิ์บํารุงสมอง เพิ่มประสิทธิภาพในการคิดและการรับรู้และต้านภาวะความจําเสื่อมของบัวบกได้รับ ความสนใจมากขึ้น เนื่องจากเป็นพืชสมุนไพรที่หาได้ง่ายและเป็นผักพื้นบ้านที่นิยมใช้รับประทาน ดังนั้นจึงมี งานวิจัยทางคลินิกเกี่ยวกับฤทธิ์ดังกล่าวจํานวนมาก	/|ฤทธิ์บํารุงสมอง| |เพิ่มประสิทธิภาพในการคิด และการรับรู้| |และต้านภาวะความจําเสื่อมของบัวบก| |ได้รับ ความสนใจมากขึ้น| |เนื่องจากเป็นพืชสมุนไพร |ที่หาได้ง่าย| |และเป็นผักพื้นบ้าน|ที่นิยมใช้รับประทาน||| |ดังนั้นจึงมี งานวิจัยทางคลินิกเกี่ยวกับฤทธิ์ดังกล่าวจํานวนมาก|/
		จากผลการทดลองดังกล่าวแสดงให้เห็นว่า บัวบกมีฤทธิ์ช่วยเพิ่มประสิทธิภาพในการคิดและการรับรู้ใน อาสาสมัครช่วงอายุระหว่างวัยกลางคนถึงสูงวัย และผู้ป่วยโรควิตกกังวลได้ดีจึงอาจเป็นอีกทางเลือกหนึ่งใน การใช้เป็นยาเพื่อบํารุงสมองได้อย่างไรก็ตาม ยังมีข้อควรระวังเกี่ยวกับการรับประทานบัวบกอยู่บ้าง โดยผล จากการศึกษาในผู้ป่วยโรคหัวใจและหลอดเลือดพบว่า ส่วนสกัดไตรเทอร์พีน (triterpene fraction) จาก บัวบกมีฤทธิ์ต้านก…	/|จากผลการทดลองดังกล่าวแสดงให้เห็นว่า |บัวบกมีฤทธิ์ช่วยเพิ่มประสิทธิภาพในการคิดและการรับรู้ใน อาสาสมัครช่วงอายุระหว่างวัยกลางคนถึงสูงวัย และผู้ป่วยโรควิตกกังวลได้ดี|| | จึงอาจเป็นอีกทางเลือกหนึ่งใน การใช้เป็นยาเพื่อบํารุงสมองได้| |อย่างไรก็ตาม ยังมีข้อควรระวังเกี่ยวกับการรับประทานบัวบกอยู่บ้าง| |โดยผล จากการศึกษาในผู้ป่วยโรคหัวใจและหลอดเลือดพบว่า |ส่วนสกัดไตรเทอร์พีน (triterpene fraction) จาก บัว…
	น้อยหน่า/custard apple	"น้อยหน่า ผลไม้มากประโยชน์" พิชานันท์ ลีแก้ว สํานักงานข้อมูลสมุนไพร คณะเภสัชศาสตร์มหาวิทยาลัยมหิดล	<Topic Name>น้อยหน่า ผลไม้มากประโยชน์<><Author Name>พิชานันท์ ลีแก้ว<><affiliation> สํานักงานข้อมูลสมุนไพร คณะเภสัชศาสตร์มหาวิทยาลัยมหิดล<>
		น้อยหน่า (custard apple หรือ sugar apple) มีชื่อวิทยาศาสตร์คือ Annona squamosa L. จัดอยู่ ในวงศ์Annonaceae ซึ่งมีพืชที่อยู่ในวงศ์เดียวกันได้แก่ ทุเรียนเทศ (A. muricata L.) และน้อยโหน่ง (A. reticulata L.) ถือเป็นผลไม้ชนิดหนึ่งที่ได้รับความนิยมในการบริโภคเป็นอย่างมาก และเป็นไม้ผลเศรษฐกิจที่ สําคัญ เนื่องจากมีเนื้อนุ่ม หอมหวาน ให้เนื้อมากและมีคุณค่าทางโภชนาการสูง คนไทยนิยมรับประทาน น้อยหน่าสด และยัง…	<|น้อยหน่า (custard apple หรือ sugar apple)|> |มีชื่อวิทยาศาสตร์คือ Annona squamosa L.| |จัดอยู่ ในวงศ์Annonaceae| |ซึ่งมีพืช |ที่อยู่ในวงศ์เดียวกัน|ได้แก่ ทุเรียนเทศ (A. muricata L.) และน้อยโหน่ง (A. reticulata L.)| |ถือเป็นผลไม้ชนิดหนึ่ง |ที่ได้รับความนิยมในการบริโภคเป็นอย่างมาก|| |และเป็นไม้ผลเศรษฐกิจที่ สําคัญ| |เนื่องจากมีเนื้อนุ่ม| |หอมหวาน| |ให้เนื้อมาก| |และมีคุณค่าทางโภชนาการสูง| |คนไทยน…
		นอกจากนี้ส่วนอื่นๆของน้อยหน่า อาทิเมล็ด ใบ เปลือก ราก และลําต้น ยังสามารถนํามาใช้เป็นสมุนไพร รักษาโรค รวมถึงการใช้ประโยชน์ในด้านการเกษตรได้หลายทาง	/|นอกจากนี้ส่วนอื่นๆของน้อยหน่า อาทิเมล็ด ใบ เปลือก ราก และลําต้น ยังสามารถนํามาใช้เป็นสมุนไพร| |รักษาโรค| |รวมถึงการใช้ประโยชน์ในด้านการเกษตรได้หลายทาง|/
		ราก -ใช้เป็นยาระบาย ทําให้อาเจียน ถอนพิษ และแก้พิษงู	<< ราก|>>/| ใช้เป็นยาระบาย| |ทําให้อาเจียน| |ถอนพิษ| |และแก้พิษงู|/<<>>
		เปลือกต้น -ใช้รักษาแผล แก้ท้องเสีย และแก้พิษงู	<<เปลือกต้น>>/| ใช้รักษาแผล| |แก้ท้องเสีย| |และแก้พิษงู/<<>>
		ใบ -ใช้รักษากลากและโรคผิวหนังอื่นๆ ขับพยาธิฆ่าหิดและเหา และแก้อักเสบ	<<ใบ>>/| ใช้รักษากลากและโรคผิวหนังอื่นๆ| |ขับพยาธิ| |ฆ่าหิดและเหา| |และแก้อักเสบ|/<<>>
		ผล -ใช้รักษากลาก เริม งูสวัด ขับพยาธิและแก้พิษงู	<<ผล>>/| ใช้รักษากลาก เริม งูสวัด| |ขับพยาธิ| |และแก้พิษงู|/<<>>
		เมล็ด -ใช้ฆ่าเหา และลดอาการบวม	<<เมล็ด>>/| ใช้ฆ่าเหา| |และลดอาการบวม|/<<>>
		พบรายงานผู้ป่วยมีอาการแพ้จากการรับประทานน้อยหน่า โดยก่อให้เกิดอาการคันในบริเวณคอหอย และลิ้น เกิดอาการบวมแดงบริเวณริมฝีปาก และเกิดผื่นลมพิษ ซึ่งในรายงานระบุว่าผู้ที่มีประวัติแพ้อะโวคาโด มะละกอ และยางพารา อาจมีโอกาสแพ้น้อยหน่าได้เช่นกัน	/|พบรายงาน |ผู้ป่วยมีอาการแพ้จากการรับประทานน้อยหน่า|| |โดยก่อให้เกิดอาการคันในบริเวณคอหอย และลิ้น| |เกิดอาการบวมแดงบริเวณริมฝีปาก| |และเกิดผื่นลมพิษ| |ซึ่งในรายงานระบุว่า |ผู้ |ที่มีประวัติแพ้อะโวคาโด มะละกอ และยางพารา| อาจมีโอกาสแพ้น้อยหน่าได้เช่นกัน||/<>
